# Supplementary material for: Mutations of Cx43 that affect B cell spreading in response to BCR signaling
Source: PubMed Central journal article supplement (PMC4001238; doi:10.1242/bio.20147328), 2014-02-13
Supplement: supp_bio.20147328_bio.20147328-s1.pdf [file supp_bio.20147328_bio.20147328-s1.pdf]

Supplementary Material

Letitia Falk et al. doi: 10.1242/bio.20147328

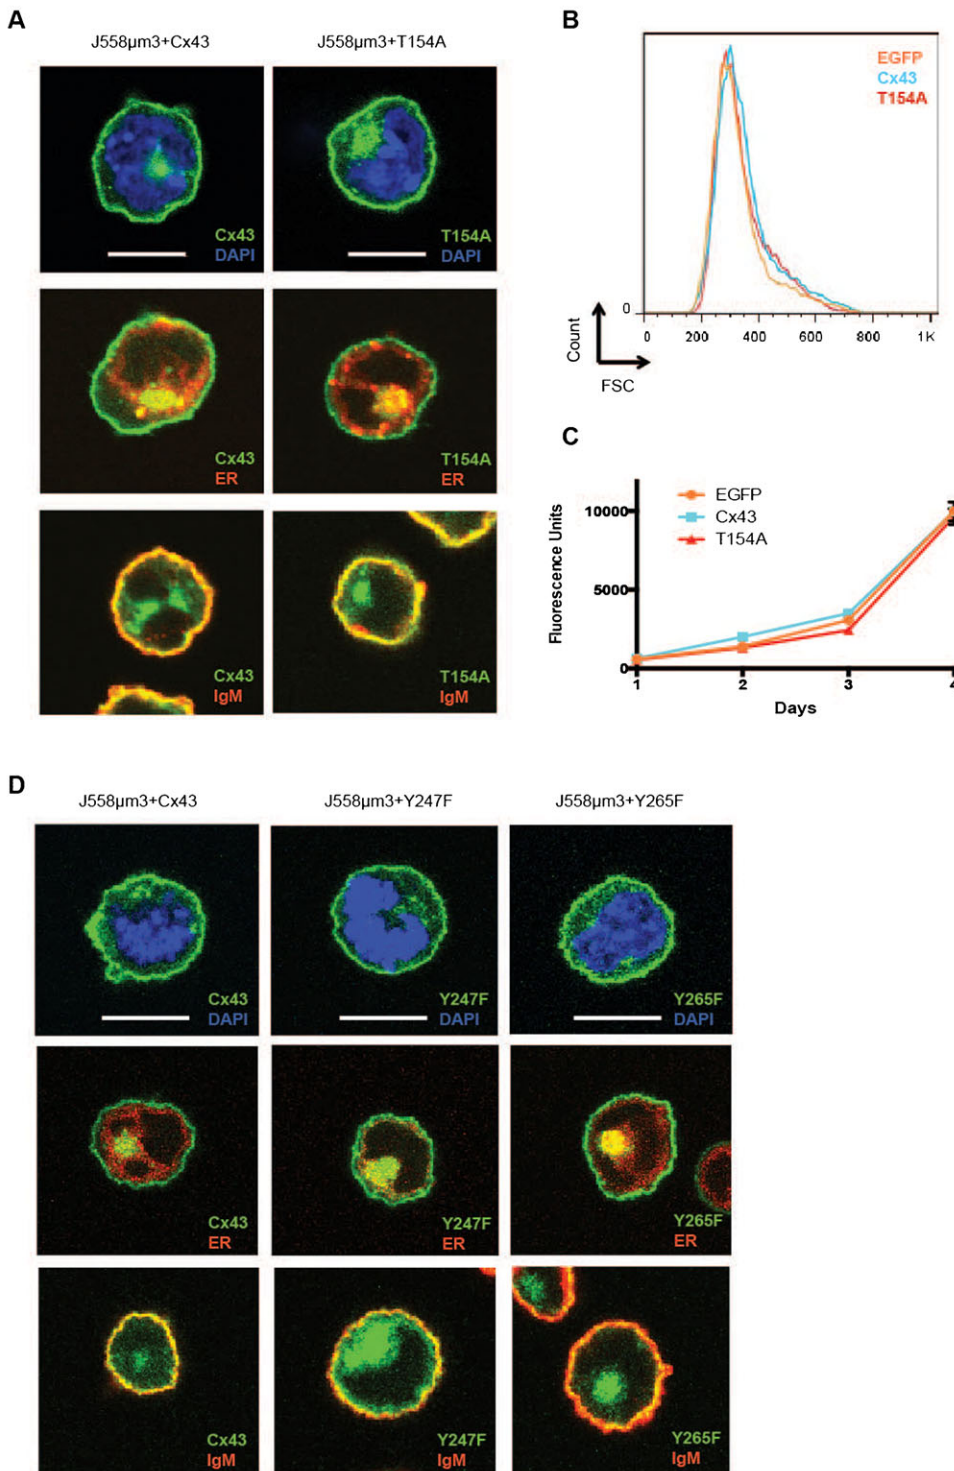

**Fig. S1. Characterization of J558 $\mu$ m3 cells expressing Cx43 mutations.**

(A) Localization of EGFP-fused WT or T154A Cx43 expressed by J558 $\mu$ m3 cells. (B) Cell size of indicated transfected cells, measured by forward scatter (FSC) using flow cytometry. (C) Cx43 and T154A expression did not affect cell proliferation over a 4-day period. Error bars represent standard error of the mean. Data are representative of three separate experiments, each done in triplicate. (D) Localization of EGFP-fused Y247F or Y265F Cx43 expressed by J558 $\mu$ m3 cells as described in panel A. Scale bars: 10  $\mu$ m.

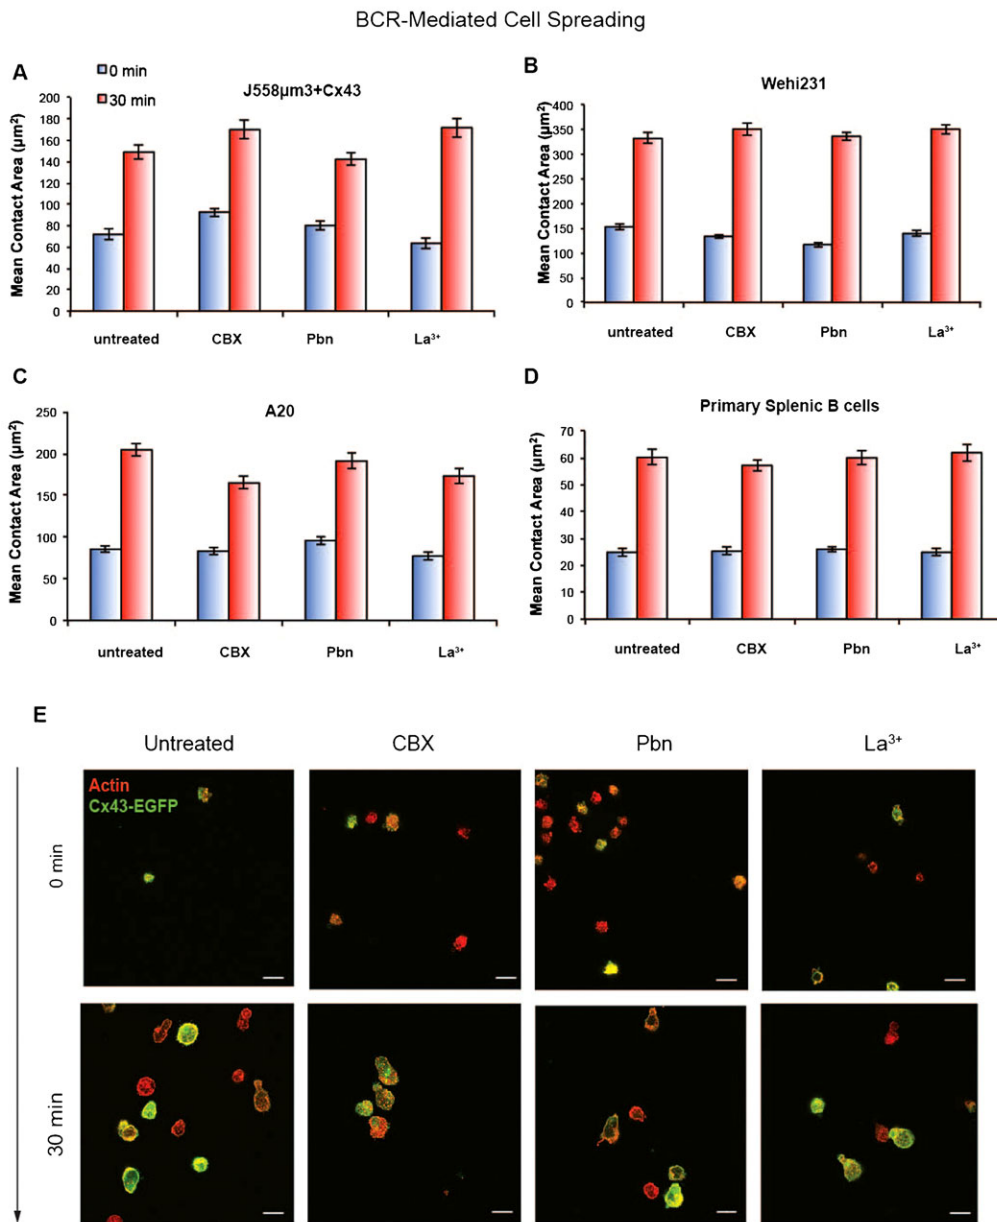

**Fig. S2. Effect of channel blocking drugs on spreading of different types of B-lymphocytes in response to BCR signaling.** Quantification of contact areas as a measure of BCR-mediated cell spreading of (A) J558µm3 cells expressing transfected Cx43-EGFP, (B) Wehi231 B lymphoma cells, (C) primary splenic B-lymphocytes, and (D) A20 B lymphoma cells. Cells were pre-treated with channel blocking drugs (100 µM CBX, 1 mM Pbn, 200 µM La<sup>3+</sup>), or left untreated as a control. No significant difference between treatment types. (E) Images of spreading J558µm3 overexpressing WT Cx43-EGFP. Scale bars: 10 µm.

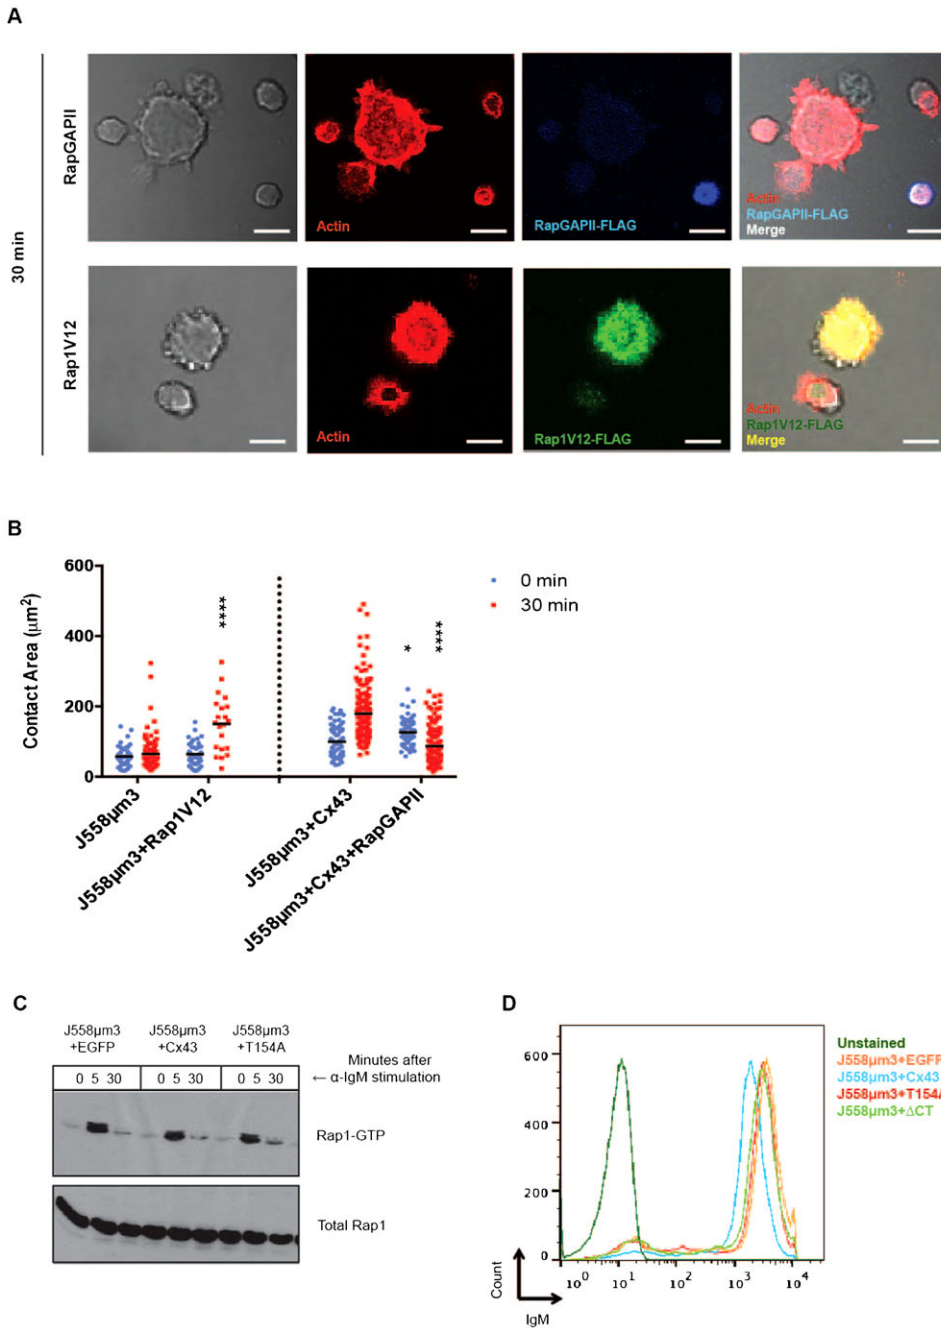

**Fig. S3. The influence of Cx43 on BCR-mediated spreading of J558μm3 cells depends upon Rap1 activation.** (A) BCR-mediated cell spreading of J558μm3 cells stably expressing Cx43-EGFP transiently transfected with RapGAPII-FLAG (upper panel), or J558μm3 transiently transfected with Rap1V12-FLAG (lower panel). Scale bars: 10 μm. (B) Quantification of spreading area as a measure of spreading. Significance between cell types \*P<0.05; \*\*\*\*P<0.0001, n=50. (C) Rap1 activation in J558μm3 cells expressing EGFP, or EGFP-fused WT or T154A Cx43. Cells were stimulated for the indicated times with 20 μg/ml of soluble anti-IgM and activated Rap1 was precipitated using a GST-RaGDS fusion protein and total Rap1 detected by blotting with anti-Rap1. (D) Surface BCR was stained using a PE-conjugated anti-IgM antibody and levels were measured by flow cytometry.
